# Supplementary material
Source: PubMed Central journal article supplement (PMC4693852)

**APPENDIX**

**Appendix Table 1: Estimated Impact of the 2011 Coding Change on Payments (full model)**

| <i>Parameter</i>                                                 | <i>Estimate</i> | <i>% Change</i> | <i>SE</i> | <i>p</i>  |
|------------------------------------------------------------------|-----------------|-----------------|-----------|-----------|
| <i>CT of the abdomen or of the pelvis (the reference group)</i>  |                 |                 |           |           |
| Intercept                                                        | 6.0418          | -               | 0.0087    | <.0001*** |
| Slope                                                            | 0.0013          | + 0.13 %        | 0.0004    | 0.0017**  |
| Change in intercept in 2011                                      | - 0.0055        | - 0.55 %        | 0.0097    | 0.5735    |
| Change in slope in 2011                                          | 0.0033          | + 0.33 %        | 0.0013    | 0.0089**  |
| <i>CT of the abdomen and pelvis (w.r.t. the reference group)</i> |                 |                 |           |           |
| Intercept                                                        | 0.5665          | + 76.21 %       | 0.0057    | <.0001*** |
| Slope                                                            | - 0.0000        | - 0.00 %        | 0.0004    | 0.9919    |
| Change in intercept in 2011                                      | - 0.2740        | - 23.97 %       | 0.0104    | <.0001*** |
| Change in slope in 2011                                          | - 0.0036        | - 0.36 %        | 0.0014    | 0.0083**  |
| <i>Health Plan Type</i>                                          |                 |                 |           |           |
| PPO (reference)                                                  | -               | -               | -         | -         |
| Comprehensive                                                    | - 0.0070        | - 0.70 %        | 0.0048    | 0.1448    |
| EPO                                                              | - 0.0183        | - 1.82 %        | 0.0061    | 0.0026**  |
| HMO                                                              | - 0.0631        | - 6.12 %        | 0.0028    | <.0001*** |
| POS                                                              | - 0.3314        | - 28.21 %       | 0.0029    | <.0001*** |
| CDHP                                                             | - 0.3637        | - 30.49 %       | 0.0041    | <.0001*** |
| HDHP                                                             | - 0.2993        | - 25.87 %       | 0.0082    | <.0001*** |
| n/a                                                              | - 0.1105        | - 10.46 %       | 0.0058    | <.0001*** |
| <i>State</i>                                                     |                 |                 |           |           |
| Massachusetts (reference)                                        | -               | -               | -         | -         |
| Alabama                                                          | - 0.0642        | - 6.22 %        | 0.0080    | <.0001*** |
| Alaska                                                           | 0.7908          | + 120.52 %      | 0.0317    | <.0001*** |
| Arizona                                                          | - 0.3889        | - 32.22 %       | 0.0101    | <.0001*** |
| Arkansas                                                         | - 0.4509        | - 36.29 %       | 0.0114    | <.0001*** |
| California                                                       | - 0.1974        | - 17.91 %       | 0.0084    | <.0001*** |
| Colorado                                                         | - 0.0545        | - 5.31 %        | 0.0125    | <.0001*** |
| Connecticut                                                      | - 0.1145        | - 10.82 %       | 0.0099    | <.0001*** |
| Delaware                                                         | - 0.3594        | - 30.19 %       | 0.0112    | <.0001*** |
| Florida                                                          | - 0.0406        | - 3.98 %        | 0.0078    | <.0001*** |
| Georgia                                                          | - 0.4215        | - 34.40 %       | 0.0075    | <.0001*** |
| Hawaii                                                           | - 0.5742        | - 43.68 %       | 0.0794    | <.0001*** |
| Idaho                                                            | 0.0423          | + 4.32 %        | 0.0217    | 0.0514    |
| Illinois                                                         | 0.5187          | + 67.98 %       | 0.0076    | <.0001*** |
| Indiana                                                          | 0.2068          | + 22.97 %       | 0.0090    | <.0001*** |

| <i>Parameter</i> | <i>Estimate</i> | <i>% Change</i> | <i>SE</i> | <i>p</i>  |
|------------------|-----------------|-----------------|-----------|-----------|
| Iowa             | 0.0472          | + 4.83 %        | 0.0118    | <.0001*** |
| Kansas           | - 0.0699        | - 6.75 %        | 0.0115    | <.0001*** |
| Kentucky         | - 0.1775        | - 16.26 %       | 0.0099    | <.0001*** |
| Louisiana        | - 0.0229        | - 2.26 %        | 0.0102    | 0.0250*   |
| Maine            | 0.1155          | + 12.25 %       | 0.0230    | <.0001*** |
| Maryland         | - 0.7271        | - 51.67 %       | 0.0092    | <.0001*** |
| Michigan         | - 0.3273        | - 27.91 %       | 0.0078    | <.0001*** |
| Minnesota        | - 0.0313        | - 3.09 %        | 0.0105    | 0.0027**  |
| Mississippi      | - 0.2557        | - 22.56 %       | 0.0086    | <.0001*** |
| Missouri         | - 0.2627        | - 23.10 %       | 0.0086    | <.0001*** |
| Montana          | 0.6011          | + 82.41 %       | 0.0105    | <.0001*** |
| Nebraska         | 0.0777          | + 8.08 %        | 0.0189    | <.0001*** |
| Nevada           | - 0.2123        | - 19.13 %       | 0.0131    | <.0001*** |
| New Hampshire    | 0.2608          | + 29.79 %       | 0.0190    | <.0001*** |
| New Jersey       | - 0.2243        | - 20.10 %       | 0.0088    | <.0001*** |
| New Mexico       | 0.5883          | + 80.09 %       | 0.0103    | <.0001*** |
| New York         | - 0.2977        | - 25.74 %       | 0.0075    | <.0001*** |
| North Carolina   | 0.1270          | + 13.54 %       | 0.0084    | <.0001*** |
| North Dakota     | - 0.1363        | - 12.74 %       | 0.0328    | <.0001*** |
| Ohio             | - 0.1331        | - 12.46 %       | 0.0079    | <.0001*** |
| Oklahoma         | 0.3680          | + 44.49 %       | 0.0089    | <.0001*** |
| Oregon           | 0.5130          | + 67.02 %       | 0.0106    | <.0001*** |
| Pennsylvania     | - 0.0724        | - 6.99 %        | 0.0091    | <.0001*** |
| Puerto Rico      | - 0.4103        | - 33.65 %       | 0.0234    | <.0001*** |
| Rhode Island     | - 0.4643        | - 37.14 %       | 0.0172    | <.0001*** |
| South Carolina   | 0.3462          | + 41.37 %       | 0.0075    | <.0001*** |
| South Dakota     | - 0.1456        | - 13.55 %       | 0.0243    | <.0001*** |
| Tennessee        | - 0.2960        | - 25.62 %       | 0.0077    | <.0001*** |
| Texas            | 0.2660          | + 30.47 %       | 0.0072    | <.0001*** |
| Utah             | 0.0705          | + 7.30 %        | 0.0169    | <.0001*** |
| Vermont          | - 0.1569        | - 14.52 %       | 0.0301    | <.0001*** |
| Virgin Islands   | 0.1153          | + 12.22 %       | 0.2708    | 0.6701    |
| Virginia         | - 0.1457        | - 13.56 %       | 0.0101    | <.0001*** |
| Washington       | - 0.0288        | - 2.84 %        | 0.0085    | 0.0007*** |
| Washington, DC   | - 0.2265        | - 20.27 %       | 0.0502    | <.0001*** |
| West Virginia    | 0.3611          | + 43.49 %       | 0.0140    | <.0001*** |
| Wisconsin        | 0.5182          | + 67.90 %       | 0.0095    | <.0001*** |
| Wyoming          | 0.7860          | + 119.47 %      | 0.0233    | <.0001*** |
| <i>n/a</i>       | - 0.4915        | - 38.83 %       | 0.0364    | <.0001*** |

Notes: \*significant at  $p \leq .05$ ; \*\*significant at  $p \leq .01$ ; \*\*\*significant at  $p \leq .001$ .

**Appendix Table 2: Estimated Impact of the 2011 Coding Change on Utilization (full model)**

| <i>Parameter</i>                                                 | <i>Estimate</i> | <i>% Change</i> | <i>SE</i> | <i>p</i>  |
|------------------------------------------------------------------|-----------------|-----------------|-----------|-----------|
| <i>CT of the abdomen or of the pelvis (the reference group)</i>  |                 |                 |           |           |
| Intercept                                                        | - 10.8499       | -               | 0.0105    | <.0001*** |
| Slope                                                            | - 0.0012        | - 0.12 %        | 0.0005    | 0.0171*   |
| Change in intercept in 2011                                      | - 0.0511        | - 4.98 %        | 0.0120    | <.0001*** |
| Change in slope in 2011                                          | 0.0044          | + 0.44 %        | 0.0016    | 0.0045**  |
| <i>CT of the abdomen and pelvis (w.r.t. the reference group)</i> |                 |                 |           |           |
| Intercept                                                        | 1.6169          | + 403.74 %      | 0.0074    | <.0001*** |
| Slope                                                            | 0.0018          | + 0.18 %        | 0.0006    | 0.0010*** |
| Change in intercept in 2011                                      | 0.0663          | + 6.85 %        | 0.0131    | <.0001*** |
| Change in slope in 2011                                          | 0.0036          | + 0.36 %        | 0.0017    | 0.0338*   |
| <i>Health Plan Type</i>                                          |                 |                 |           |           |
| PPO (reference)                                                  | -               | -               | -         | -         |
| Comprehensive                                                    | 0.8655          | + 137.62%       | 0.0057    | <.0001*** |
| EPO                                                              | 0.6507          | + 91.69%        | 0.0074    | <.0001*** |
| HMO                                                              | - 0.0191        | - 1.89%         | 0.0037    | <.0001*** |
| POS                                                              | 0.2591          | + 29.58%        | 0.0037    | <.0001*** |
| CDHP                                                             | 0.2993          | + 34.89%        | 0.0051    | <.0001*** |
| HDHP                                                             | 0.6514          | + 91.82%        | 0.0087    | <.0001*** |
| <i>n/a</i>                                                       | 0.5458          | + 72.60%        | 0.0065    | <.0001*** |
| <i>State</i>                                                     |                 |                 |           |           |
| Massachusetts (reference)                                        | -               | -               | -         | -         |
| Alabama                                                          | 0.3881          | + 47.42%        | 0.0114    | <.0001*** |
| Alaska                                                           | 0.9379          | + 155.46%       | 0.0367    | <.0001*** |
| Arizona                                                          | 0.2214          | + 24.78%        | 0.0122    | <.0001*** |
| Arkansas                                                         | 0.2932          | + 34.07%        | 0.0150    | <.0001*** |
| California                                                       | - 0.7985        | - 55.00%        | 0.0102    | <.0001*** |
| Colorado                                                         | 0.1177          | + 12.49%        | 0.0136    | <.0001*** |
| Connecticut                                                      | 0.0136          | + 1.37%         | 0.0122    | 0.2627    |
| Delaware                                                         | 0.3672          | + 44.37%        | 0.0132    | <.0001*** |
| Florida                                                          | 0.1493          | + 16.10%        | 0.0096    | <.0001*** |
| Georgia                                                          | 0.0152          | + 1.53%         | 0.0095    | 0.1089    |
| Hawaii                                                           | 2.8689          | + 1,661.76%     | 0.0824    | <.0001*** |
| Idaho                                                            | 0.5656          | + 76.05%        | 0.0224    | <.0001*** |
| Illinois                                                         | - 0.1487        | - 13.82%        | 0.0097    | <.0001*** |
| Indiana                                                          | 0.1494          | + 16.11%        | 0.0104    | <.0001*** |
| Iowa                                                             | 0.1492          | + 16.09%        | 0.0147    | <.0001*** |
| Kansas                                                           | 0.2785          | + 32.11%        | 0.0140    | <.0001*** |
| Kentucky                                                         | 0.5180          | + 67.87%        | 0.0116    | <.0001*** |

| <i>Parameter</i>        | <i>Estimate</i> | <i>% Change</i> | <i>SE</i> | <i>p</i>  |
|-------------------------|-----------------|-----------------|-----------|-----------|
| Louisiana               | 0.3523          | + 42.23%        | 0.0131    | <.0001*** |
| Maine                   | 0.4522          | + 57.18%        | 0.0209    | <.0001*** |
| Maryland                | 0.2844          | + 32.90%        | 0.0124    | <.0001*** |
| Michigan                | - 0.1054        | - 10.00%        | 0.0097    | <.0001*** |
| Minnesota               | 0.1254          | + 13.36%        | 0.0130    | <.0001*** |
| Mississippi             | 0.1387          | + 14.88%        | 0.0117    | <.0001*** |
| Missouri                | 0.2150          | + 23.99%        | 0.0104    | <.0001*** |
| Montana                 | - 0.0678        | - 6.56%         | 0.0145    | <.0001*** |
| Nebraska                | 0.2097          | + 23.33%        | 0.0187    | <.0001*** |
| Nevada                  | 0.1940          | + 21.41%        | 0.0153    | <.0001*** |
| New Hampshire           | 0.4169          | + 51.73%        | 0.0182    | <.0001*** |
| New Jersey              | - 0.1995        | - 18.09%        | 0.0106    | <.0001*** |
| New Mexico              | 0.0842          | + 8.78%         | 0.0118    | <.0001*** |
| New York                | - 0.2229        | - 19.98%        | 0.0095    | <.0001*** |
| North Carolina          | 0.0885          | + 9.25%         | 0.0106    | <.0001*** |
| North Dakota            | 0.9293          | + 153.27%       | 0.0345    | <.0001*** |
| Ohio                    | 0.0853          | + 8.90%         | 0.0096    | <.0001*** |
| Oklahoma                | 0.1624          | + 17.63%        | 0.0115    | <.0001*** |
| Oregon                  | 0.0030          | + 0.30%         | 0.0137    | 0.8237    |
| Pennsylvania            | - 0.0511        | - 4.98%         | 0.0105    | <.0001*** |
| Puerto Rico             | 0.7231          | + 106.08%       | 0.0384    | <.0001*** |
| Rhode Island            | 0.4185          | + 51.97%        | 0.0201    | <.0001*** |
| South Carolina          | 0.2218          | + 24.83%        | 0.0102    | <.0001*** |
| South Dakota            | 0.6411          | + 89.86%        | 0.0282    | <.0001*** |
| Tennessee               | 0.2856          | + 33.06%        | 0.0100    | <.0001*** |
| Texas                   | - 0.1268        | - 11.91%        | 0.0092    | <.0001*** |
| Utah                    | 0.4447          | + 56.00%        | 0.0176    | <.0001*** |
| Vermont                 | 1.3917          | + 302.17%       | 0.0344    | <.0001*** |
| Virgin Islands          | 3.7804          | + 4,283.36%     | 0.3142    | <.0001*** |
| Virginia                | 0.1124          | + 11.90%        | 0.0113    | <.0001*** |
| Washington              | 0.0034          | + 0.34%         | 0.0113    | 0.7642    |
| Washington, DC          | 1.6271          | + 408.91%       | 0.0534    | <.0001*** |
| West Virginia           | 0.7686          | + 115.67%       | 0.0152    | <.0001*** |
| Wisconsin               | 0.0423          | + 4.32%         | 0.0117    | 0.0003*** |
| Wyoming                 | 1.0319          | + 180.64%       | 0.0281    | <.0001*** |
| <i>n/a</i>              | 0.9771          | + 165.67%       | 0.0386    | <.0001*** |
| <i>Other covariates</i> |                 |                 |           |           |
| Weekend Indicator       | - 0.8456        | - 57.07 %       | 0.0032    | <.0001*** |
| <i>Dispersion</i>       | 0.0726          | -               | 0.0007    | -         |

Notes: \*significant at  $p \leq .05$ ; \*\*significant at  $p \leq .01$ ; \*\*\*significant at  $p \leq .001$ .

Appendix Figure 1: Median adjusted payment per combined CT scan of the abdomen and pelvis by health plan type

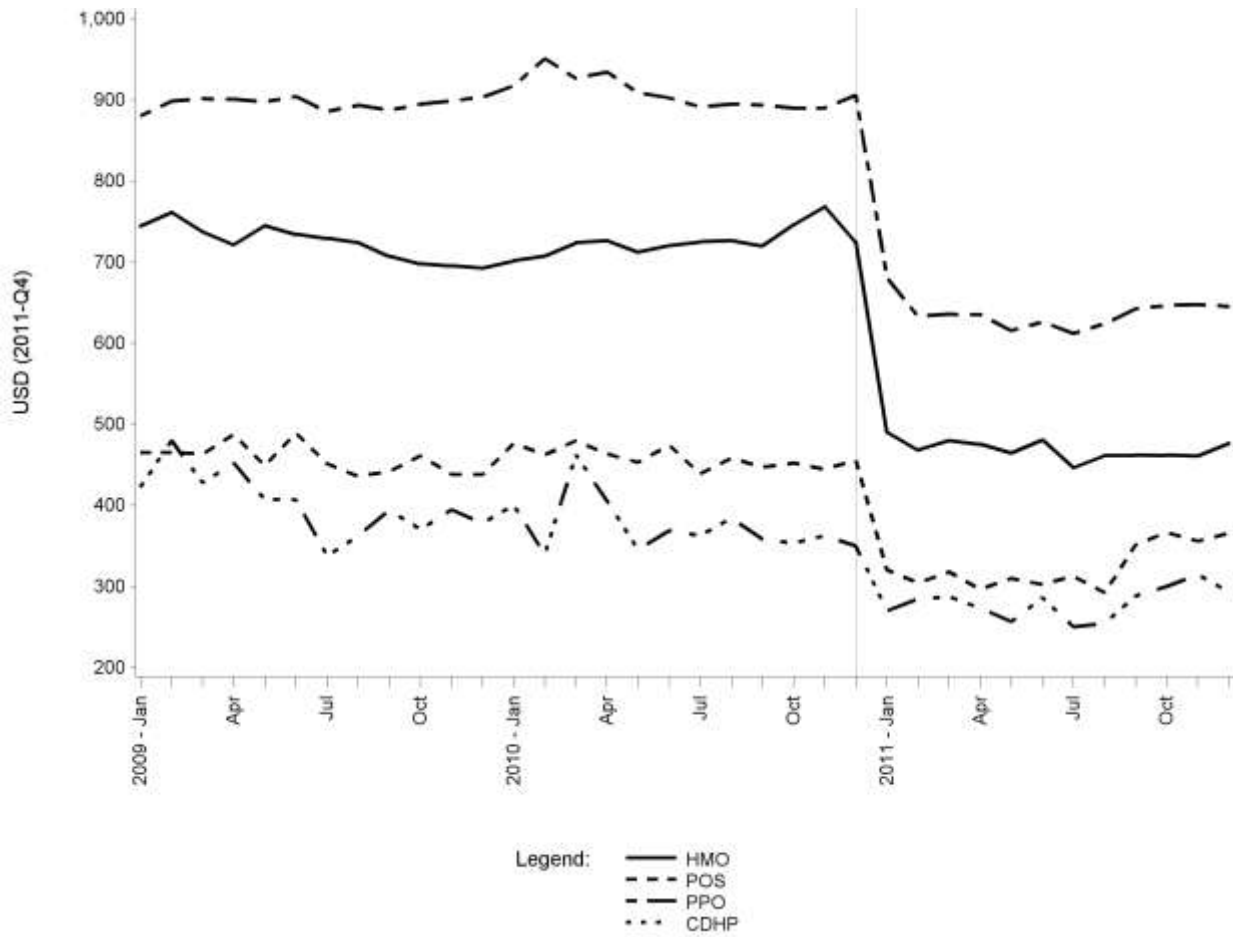

Appendix Figure 2: Median adjusted payment per combined CT scan of the abdomen and pelvis by region

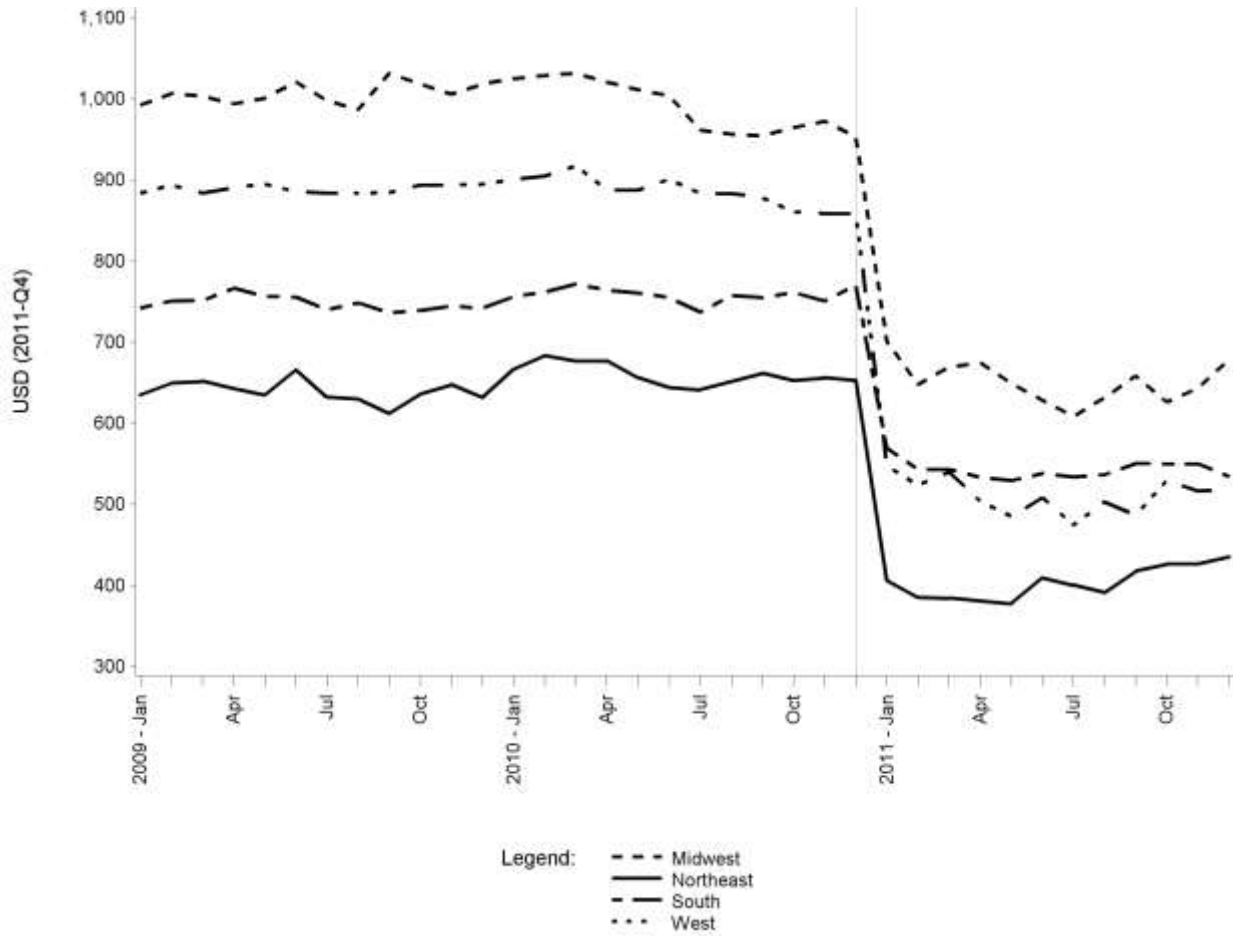

Supplement: HESR-50-1910-s002.pdf [file HESR-50-1910-s002.pdf]
